# Supplementary material
Source: publisher figshare collection journal article supplement (https://acs.figshare.com/ndownloader/files/5798082)

#### Terms & Conditions

Electronic Supporting Information files are available without a subscription to ACS Web Editions. The American Chemical Society holds a copyright ownership interest in any copyrightable Supporting Information. Files available from the ACS website may be downloaded for personal use only. Users are not otherwise permitted to reproduce, republish, redistribute, or sell any Supporting Information from the ACS website, either in whole or in part, in either machine-readable form or any other form without permission from the American Chemical Society. For permission to reproduce, republish and redistribute this material, requesters must process their own requests via the RightsLink permission system. Information about how to use the RightsLink permission system can be found at <http://pubs.acs.org/page/copyright/permissions.html>

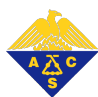

ACS Publications

MOST TRUSTED. MOST CITED. MOST READ.

Copyright © 1997 American Chemical Society

AUG 08 1997

Rychnovsky and Powell

Supporting Information

REVISED

Page 1

## Dialkylzinc Additions to 4-Acetoxy-1,3-dioxanes: A Highly Stereoselective Route to Protected *anti*-1,3-Diols.

Scott D. Rychnovsky\* and Noel A. Powell

*Department of Chemistry, University of California, Irvine, California, 92697-2025*

### Supporting Information

#### General Experimental Information.

All moisture and air-sensitive reactions were carried out in flame or oven-dried glassware using magnetic stirring under a positive pressure of nitrogen or argon gases. Reaction solvents were distilled or obtained from an alumina filtration system when necessary.<sup>1</sup> Thin layer chromatography was performed on Whatman silica gel PE SIL G/UV or Macherey-Nagel silica gel SIL G/UV (0.25 mm) plates. Concentration in vacuo was done using a Büchi rotary evaporator. Flash chromatography was performed on EM Science 230-400 mesh silica gel. Melting points were determined using an Electrothermal apparatus and are reported uncorrected. Infrared spectra were recorded on a MIDAC Grams/Prospect FT-IR. NMR spectra were measured on GE QE300, GN500, and Ω500, and Bruker DRX400 and DRX500 MHz FT-NMR instruments. Proton NMR spectra were referenced to residual solvent: CDCl<sub>3</sub> (7.26 ppm). Carbon NMR spectra were recorded in ppm relative to the solvent signal: CDCl<sub>3</sub> (77.00 ppm). Mass spectral data was obtained on Finnigan MAT95 and 7070 instruments using EI or CI methods. Elemental analyses were performed by MHW Laboratories of Phoenix, AZ.

Initial experiments using diethylzinc were performed using a 1 *M* hexane solution purchased from Aldrich Chemical Company. Neat Et<sub>2</sub>Zn, purchased from Strem Chemicals Inc., was used in the preparation of the functionalized dialkylzinc reagents. Dimethylzinc was purchased from Fluka as a 2 *M* toluene solution. Trimethylsilyl trifluoromethanesulfonate

<sup>1</sup> Pangborn, A. B.; Giardello, M. A.; Grubbs, R. H.; Rosen, R. K.; Timmers, F. J., *Organometallics*, 1996, 15, 1518-1520.

(TMSOTf) was prepared from trifluoromethanesulfonic acid and allyltrimethylsilane<sup>2</sup> or tetramethylsilane<sup>3</sup> and stored over poly(4-vinylpyridine) under Ar.

**A General Procedure for the coupling of dialkylzinc reagents with (2S\*, 4R\*, 6S\*)-4-acetoxy-2-*t*-Butyl-6-hexyl-1,3-dioxane (2): Preparation of (2R\*, 4S\*, 6S\*)-2-*t*-Butyl-4-ethyl-6-hexyl-1,3-dioxane (4a).** A flame-dried 10 mL round-bottomed flask was charged with 0.216 g (0.753 mmol) 4-acetoxy-1,3-dioxane **2** and 3 mL CH<sub>2</sub>Cl<sub>2</sub> and cooled to -78 °C in a dry ice/acetone bath. Et<sub>2</sub>Zn (1.51 mL, 1.51 mmol, 1 *M* in hexane) was added via syringe, followed by 205 µL (1.13 mmol) TMSOTf. The reaction was stirred at -78 °C for 2 hr and then quenched with Et<sub>3</sub>N and sat'd NaHCO<sub>3</sub> and warmed to rt. The organic layer was washed with ice-cold 1 *N* NaHSO<sub>4</sub>, sat'd NaHCO<sub>3</sub>, dried over MgSO<sub>4</sub>, and concentrated. The residual oil was purified by flash chromatography (SiO<sub>2</sub>, 20% CH<sub>2</sub>Cl<sub>2</sub>/hexanes) to give 0.176 g (91%) of a clear oil as a 51:1 mixture of diastereomers: R<sub>f</sub> 0.29 (30% CH<sub>2</sub>Cl<sub>2</sub>/hexanes); FT-IR (neat) 2956, 2933, 2861, 1462, 1360, 1218, 1136, 1078, 1000 cm<sup>-1</sup>; <sup>1</sup>H NMR (500 MHz, CDCl<sub>3</sub>) δ 4.29 (s, 1 H), 3.91 (ddd, *J* = 10.7, 5.8, 5.8 Hz, 1 H), 3.67 (m, 1 H), 1.99 (m, 1 H), 1.74 (ddd, *J* = 12.5, 12.5, 6.1 Hz, 1 H), 1.45 (m, 4 H), 1.29 (m, 8 H), 0.93 (t, *J* = 7.4 Hz, 3 H), 0.89 (s, 9 H), 0.85 (t, *J* = 7.5 Hz, 3 H); <sup>13</sup>C NMR (125 MHz, CDCl<sub>3</sub>, DEPT) *C* 34.0; CH 99.4, 73.2, 71.6; CH<sub>2</sub> 36.0, 31.6, 28.9, 24.8, 24.5, 23.4, 22.3; CH<sub>3</sub> 24.4 (3), 13.8, 10.1; HRMS (CI/isobutane) calcd for [C<sub>16</sub>H<sub>32</sub>O<sub>2</sub>+H]<sup>+</sup> 257.2480, found 257.2470. Anal. calcd. for C<sub>16</sub>H<sub>32</sub>O<sub>2</sub>: C, 74.94; H, 12.58. Found: C, 75.27; H, 12.39.

**(2R\*,4S\*,6S\*)-2-*t*-Butyl-6-hexyl-4-methyl-1,3-dioxane (4c).** Reaction according to the above protocol using 0.156 g (0.544 mmol) **2** and 0.55 mL (1.09 mmol, 2 *M* in toluene) dimethylzinc in the presence of 148 µL TMSOTf yielded 0.119 mg (90%) of a clear oil as a single diastereomer after purification by flash chromatography (30% CH<sub>2</sub>Cl<sub>2</sub>/hexanes): R<sub>f</sub> 0.68

<sup>2</sup> (a) Morita, T.; Okamoto, Y.; Sakurai, H. *Synthesis* **1981**, 745-746. (b) Olah, G. A.; Husain, A.; Balaram Gupta, B. G.; Salem, G. F.; Narang, S. C. *J. Org. Chem.* **1981**, *46*, 5212-5214.

<sup>3</sup> Demuth, M.; Mikhail, G. *Synthesis* **1982**, 827-828.

(10% EtOAc/hexanes); FT-IR (neat) 2954, 2932, 2860, 1460, 1378, 1147, 1076, 1000  $\text{cm}^{-1}$ ;  $^1\text{H}$  NMR (300 MHz,  $\text{CDCl}_3$ )  $\delta$  4.36 (s, 1 H), 5.27 (dq,  $J = 6.7, 6.7$  Hz, 1 H), 3.71 (m, 1 H), 1.75 (ddd,  $J = 12.1, 6.1$  Hz, 1 H), 1.53-1.24 (m, 11 H), 1.31 (d,  $J = 6.9$  Hz, 3 H), 0.88 (s, 12 H);  $^{13}\text{C}$  NMR (75 MHz,  $\text{CDCl}_3$ , DEPT) C 34.7; CH 99.6, 71.3, 67.7;  $\text{CH}_2$  36.2, 35.4, 31.9, 29.3, 25.1, 22.6;  $\text{CH}_3$  24.7 (3), 17.3, 14.1; HRMS (CI/isobutane) calcd for  $[\text{C}_{15}\text{H}_{30}\text{O}_2 + \text{H}]^+$  243.2324, found 243.2323. Anal. calcd. for  $\text{C}_{15}\text{H}_{30}\text{O}_2$ : C, 74.32; H, 12.47. Found: C, 74.49; H, 12.43.

**(2*S*\*,4*R*\*,6*S*\*)-2-*t*-Butyl-4-isopropyl-6-hexyl-1,3-dioxane (4d).** 4-Acetoxy-1,3-dioxane **2** (99.2 mg, 0.346 mmol) was treated with 0.10 mL (0.70 mmol)  $i\text{-Pr}_2\text{Zn}^4$  and 76  $\mu\text{L}$  (0.419 mmol) TMSOTf according to the general protocol above to yield 0.103 g (90%) of a clear oil as a single diastereomer after purification by flash chromatography ( $\text{SiO}_2$ , 20%  $\text{CH}_2\text{Cl}_2/\text{hexanes}$ ):  $R_f$  0.45 (30%  $\text{CH}_2\text{Cl}_2/\text{hexanes}$ ); FT-IR (neat) 2957, 2929, 2864, 1464, 1219, 1133, 1119, 1046, 999  $\text{cm}^{-1}$ ;  $^1\text{H}$  NMR (400 MHz,  $\text{CDCl}_3$ )  $\delta$  4.28 (s, 1 H), 3.63 (m, 1 H), 3.45 (ddd,  $J = 10.4, 5.2, 1.6$  Hz, 1 H), 2.26 (m, 1H), 1.64 (ddd,  $J = 13.6, 11.2, 6.0$  Hz, 1 H), 1.55 (m, 1 H), 1.50-1.34 (m, 10H), 0.96 (d,  $J = 6.4$  Hz, 3 H), 0.89 (s, 12 H), 0.84 (d,  $J = 6.8$  Hz, 3 H);  $^{13}\text{C}$  NMR (100 MHz,  $\text{CDCl}_3$ , DEPT) C 43.5; CH 95.7, 78.0, 72.8, 36.8;  $\text{CH}_2$  44.5, 40.9, 40.9, 38.8, 35.5, 33.5;  $\text{CH}_3$  35.2 (3), 31.2, 30.8, 26.7; HRMS (CI/isobutane) calcd for  $[\text{C}_{17}\text{H}_{34}\text{O}_2 + \text{H}]^+$  271.2637, found 271.2636. Anal. calcd. for  $\text{C}_{17}\text{H}_{34}\text{O}_2$ : C, 75.50; H, 12.67. Found: C, 75.61; H, 12.56.

**(2*S*\*,4*S*\*,6*S*\*)-2-*t*-Butyl-4-decyl-6-hexyl-1,3-dioxane (4e).** A 100 mL Schlenk flask was charged with 2.02 mL (10.69 mmol) 1-decene and 15 mL THF under Ar.  $\text{BH}_3 \cdot \text{SMe}_2$  (0.35 mL, 3.56 mmol) was added via syringe and the resulting clear solution was stirred at rt for 16 hr. The solvent and volatiles were distilled under vacuum (0.2 mm Hg, 0  $^\circ\text{C}$  to rt, 6 hr). The resulting clear oil was dissolved in 10 mL dry hexanes and cooled in an ice bath.  $\text{Et}_2\text{Zn}$  (0.73 mL, 7.13 mmol) was added and the mixture was stirred at 0  $^\circ\text{C}$  for 30 min. The volatiles were

<sup>4</sup> Rathke, M. W.; Yu, H. *J. Org. Chem.* **1972**, *37*, 1732-1734.

removed under vacuum and the excess  $\text{Et}_2\text{Zn}$  was distilled (0.2 mm Hg, 25 °C, 3 hr). The resulting brown oil was diluted with 3 mL dry hexanes to make a 1.8 M solution.

4-Acetoxy-1,3-dioxane **2** (0.100 g, 0.349 mmol) was treated with 0.58 mL  $\text{Dec}_2\text{Zn}$  (1.05 mole, 1.8 M in hexanes) and 95  $\mu\text{L}$  (0.524 mmol) TMSOTf according to the above protocol to yield 88.3 mg (69%) of a clear oil as a single diastereomer after purification by flash chromatography ( $\text{SiO}_2$ , 15%  $\text{CH}_2\text{Cl}_2$ /hexanes then 20%):  $R_f$  0.48 (30%  $\text{CH}_2\text{Cl}_2$ /hexanes); FT-IR (neat) 2928, 2856, 1463, 1361, 1217, 1134, 1119, 1078, 1047, 998  $\text{cm}^{-1}$ ;  $^1\text{H}$  NMR (300 MHz,  $\text{CDCl}_3$ )  $\delta$  4.30 (s, 1 H), 4.01 (m, 1 H), 3.68 (m, 1 H), 1.97 (m, 1 H), 1.73 (ddd,  $J = 12.5, 12.5, 6.2$  Hz, 1 H), 1.56-1.20 (m, 28 H), 0.88 (s, 15 H);  $^{13}\text{C}$  NMR (125 MHz,  $\text{CDCl}_3$ , DEPT) C 34.8; CH 99.7, 71.9, 71.8;  $\text{CH}_2$  36.3, 34.5, 31.9, 31.8, 30.7, 29.6 (3), 29.5, 29.3, 29.2, 25.8, 25.1, 22.7, 22.6;  $\text{CH}_3$  24.7 (3), 14.1 (2); HRMS (CI/isobutane) calcd for  $[\text{C}_{24}\text{H}_{48}\text{O}_2+\text{H}]^+$  369.3732, found 369.3731.

**(2S\*,4S\*,6S\*)-2-*t*-Butyl-4-(4'-chlorobutyl)-6-hexyl-1,3-dioxane (4f).** A flame-dried 25 mL Schlenk flask was purged with Ar and charged with ca. 4 mg CuI (1 mole %) and 0.32 mL (2.62 mmol) 4-chloro-1-iodobutane.  $\text{Et}_2\text{Zn}$  (0.40 mL, 3.93 mmol) was added via syringe, and the resulting gray slurry was stirred at 50 °C for 18 hr. The Schlenk flask was then evacuated (0.1 mm Hg) and heated at 50 °C for 2 hr to distill off excess  $\text{Et}_2\text{Zn}$ . The dialkylzinc (reddish gray oil) was dissolved in 3 mL  $\text{CH}_2\text{Cl}_2$  and reacted with 0.150 g (0.524 mmol) **2** and 115  $\mu\text{L}$  (0.628 mmol) TMSOTf according to the general protocol to yield 0.137 g (82%) of a clear oil as a single diastereomer after purification by flash chromatography ( $\text{SiO}_2$ , 20%  $\text{CH}_2\text{Cl}_2$ /hexanes then 30%):  $R_f$  0.17 (10%  $\text{CH}_2\text{Cl}_2$ /hexanes); FT-IR (neat) 2932, 2860, 1483, 1460, 1360, 1216, 1123, 1075, 997  $\text{cm}^{-1}$ ;  $^1\text{H}$  NMR (500 MHz,  $\text{CDCl}_3$ )  $\delta$  4.29 (s, 1 H), 4.01 (dddd,  $J = 5.4, 5.4, 5.4, 5.4$  Hz, 1 H), 3.67 (m, 1 H), 3.55 (t,  $J = 6.7$  Hz, 2H), 2.05 (m, 1 H), 1.80 (m, 3 H), 1.60-1.28 (m, 13 H), 0.88 (s, 12 H);  $^{13}\text{C}$  NMR (125 MHz,  $\text{CDCl}_3$ , DEPT) C 34.9; CH 99.8, 71.8, 71.5;  $\text{CH}_2$  45.0, 36.3, 34.4, 32.3, 31.8, 29.9, 29.2, 25.1, 23.1, 22.6;  $\text{CH}_3$  24.7 (3), 14.1; HRMS (CI/isobutane) calcd for  $[\text{C}_{18}\text{H}_{35}\text{ClO}_2-\text{H}]^+$  317.2247, found 317.2251.

**(2*S*\*,4*S*\*,6*S*\*)-2-*t*-Butyl-4-(ethoxybutyrate)-6-hexyl-1,3-dioxane (4g).** A 25 mL Schlenk flask was charged with 0.507 g (2.10 mmol) ethyl 4-iodobutyrate and 2 mg (0.011 mmol) CuI. Et<sub>2</sub>Zn (0.32 mL, 3.1 mmol) was added via syringe, and the resulting slurry was stirred at 50 °C for 18 hr. Excess Et<sub>2</sub>Zn was distilled off under vacuum (0.1 mm Hg, 50 °C, 3 hr). The resulting black oil was treated with 0.150 g, (0.524 mmol) **2** and 115 μL (0.628 mmol) TMSOTf according to the above protocol to yield 0.139 g (77%) of a clear oil as a single diastereomer after purification by flash chromatography (SiO<sub>2</sub>, 50% CH<sub>2</sub>Cl<sub>2</sub>/hexanes then 5% EtOAc/hexanes): R<sub>f</sub> 0.22 (10% EtOAc/hexanes); FT-IR (neat) 2952, 2932, 2862, 1738, 1460, 1373, 1167, 1124, 1074, 1040, 998 cm<sup>-1</sup>; <sup>1</sup>H NMR (500 MHz, CDCl<sub>3</sub>) δ 4.29 (s, 1 H), 4.12 (q, *J* = 7.1 Hz, 2 H), 4.02 (dddd, *J* = 5.4, 5.4, 5.4, 5.4 Hz, 1 H), 3.66 (m, 1 H), 2.34 (m, 2H), 2.05 (dddd, *J* = 14.0, 10.0, 10.0, 4.5 Hz, 1 H), 1.80 (m, 1 H), 1.77 (ddd, *J* = 12.8, 12.8, 6.1 Hz, 1 H), 1.63 (m, 1 H), 1.49 (m, 1 H), 1.40-1.21 (m, 14 H), 0.88 (s, 12 H); <sup>13</sup>C NMR (125 MHz, CDCl<sub>3</sub>, DEPT) C 173.6, 34.8; CH 99.7, 71.8, 71.4; CH<sub>2</sub> 60.2, 36.2, 34.4, 33.9, 31.8, 30.0, 29.2, 25.0, 22.6, 21.3; CH<sub>3</sub> 24.7 (3), 14.2, 14.1; HRMS (CI/isobutane) calcd for [C<sub>20</sub>H<sub>38</sub>O<sub>4</sub>+H]<sup>+</sup> 343.2848, found 343.2843.

**(2*S*\*,4*S*\*,6*S*\*)-4-(3-Benzoyloxypropyl)-2-*t*-Butyl-6-hexyl-1,3-dioxane (4h).** A 50 mL Schlenk flask was charged with 0.226 g (1.40 mmol) allyl benzoate and 3 mL Et<sub>2</sub>O and cooled in an ice bath. Et<sub>2</sub>BH (0.14 mL, 98 mg, 1.4 mmol) was added via syringe and the solution was stirred at rt for 3 hr. The solvents were removed under reduced pressure (0.1 mm Hg, 0 °C, 30 min). After cooling in an ice bath, Et<sub>2</sub>Zn (0.29 mL, 2.8 mmol) was added via syringe, and the resulting solution was stirred at 0 °C for 30 min. Excess Et<sub>2</sub>Zn was distilled off under vacuum (0.1 mm Hg, 0 °C to rt., 3 hr). The oil was treated with 0.100 g, (0.349 mmol) **2** and 76 μL (0.093 mmol) TMSOTf according to the above protocol to yield 0.0748 g (55%) of a clear oil as a 18:1 ratio of diastereomers after purification by flash chromatography (SiO<sub>2</sub>, 50% CH<sub>2</sub>Cl<sub>2</sub>/hexanes then 5% EtOAc/hexanes): FT-IR (neat) 3065, 2954, 2930, 2860, 1721, 1603,

1585, 1453, 1403, 1360, 1315, 1274, 1050, 997  $\text{cm}^{-1}$ ;  $^1\text{H}$  NMR (500 MHz,  $\text{CDCl}_3$ )  $\delta$  8.06 (dd,  $J$  = 8.4, 1.2 Hz, 2 H), 7.56 (tt,  $J$  = 7.6, 1.2 Hz, 1 H), 7.44 (t,  $J$  = 7.6 Hz, 2 H), 4.38 (m, 2 H), 4.32 (s, 1 H), 4.09 (dddd,  $J$  = 5.2, 5.2, 5.2, 5.2 Hz, 1 H), 3.69 (m, 1 H), 2.19 (dddd,  $J$  = 15.1, 10.3, 10.3, 4.8 Hz, 1 H), 1.93 (m, 1 H), 1.80 (m, 2 H), 1.50 (m, 2 H), 1.42-1.28 (m, 10 H), 0.89 (s, 12 H);  $^{13}\text{C}$  NMR (125 MHz,  $\text{CDCl}_3$ , DEPT) C 166.6, 130.4, 34.8; CH 132.8, 129.5, 128.3, 99.7, 71.8, 71.2;  $\text{CH}_2$  64.8, 36.2, 34.5, 31.8, 29.2, 27.2, 25.2, 25.0, 22.6;  $\text{CH}_3$  24.6 (3), 14.0; HRMS (CI/isobutane) calcd for  $[\text{C}_{24}\text{H}_{38}\text{O}_4+\text{H}]^+$  391.2848, found 391.2840. Anal. calcd. for  $\text{C}_{24}\text{H}_{38}\text{O}_4$ : C, 73.81; H, 9.81. Found: C, 73.65; H, 10.11.

**(2S\*,4S\*,6S\*)-2-*t*-Butyl-4-(3'-*t*-butyldimethylsilyloxypropyl)-6-hexyl-1,3-dioxane (4i).** A 25 mL Schlenk flask was charged with 0.242 g (1.40 mmol) 3-*t*-butyldimethylsilyloxy-1-propene under Ar.  $\text{Et}_2\text{BH}$  (0.20 mL, 145 mg, 2.1 mmol) was added via syringe and the solution was stirred at rt for 18 hr. The solvents were removed under reduced pressure (0.2 mm Hg, 25 °C, 2 hr). After cooling in an ice bath,  $\text{Et}_2\text{Zn}$  (0.29 mL, 2.8 mmol) was added via syringe, and the resulting solution was stirred at 0 °C for 45 min. Excess  $\text{Et}_2\text{Zn}$  was distilled off under vacuum (0.2 mm Hg, 50 °C, 5 hr). The black oil was treated with 0.100 g, (0.349 mmol) **2** and 76  $\mu\text{L}$  (0.093 mmol) TMSOTf according to the above protocol to yield 0.117 g (83%) of a clear oil as a 13:1 ratio of diastereomers after purification by flash chromatography ( $\text{SiO}_2$ , 20%  $\text{CH}_2\text{Cl}_2$ /hexanes then 30%): FT-IR (neat) 2952, 2930, 2858, 1463, 1380, 1360, 1254, 1101, 1000, 836  $\text{cm}^{-1}$ ;  $^1\text{H}$  NMR (500 MHz,  $\text{CDCl}_3$ )  $\delta$  4.30 (s, 1 H), 4.02 (dddd,  $J$  = 5.2, 5.2, 5.2, 5.2 Hz, 1 H), 3.65 (m, 3 H), 2.05 m, 1 H), 1.76 (ddd,  $J$  = 13.1, 13.1, 6.2 Hz, 1 H), 1.63 (m, 1 H), 1.55-1.28 (m, 13 H), 0.88 (s, 12 H), 0.87 (s, 9 H), 0.05 (s, 6 H);  $^{13}\text{C}$  NMR (125 MHz,  $\text{CDCl}_3$ , DEPT) C 34.8, 18.3; CH 99.7, 71.8, 71.7;  $\text{CH}_2$  62.9, 36.3, 34.6, 31.9, 29.2, 29.1, 27.0, 25.0, 22.62;  $\text{CH}_3$  26.0 (3), 24.70 (3), 14.0, -5.3 (2); HRMS (CI/isobutane) calcd for  $[\text{C}_{23}\text{H}_{48}\text{O}_3\text{Si}+\text{H}]^+$  401.3451, found. Anal. calcd. for  $\text{C}_{24}\text{H}_{38}\text{O}_4$ : C, 68.94; H, 12.07. Found: C, 69.09; H, 12.10.

**Scheme 1. Synthesis of *Syn* Standard Acetal (6).**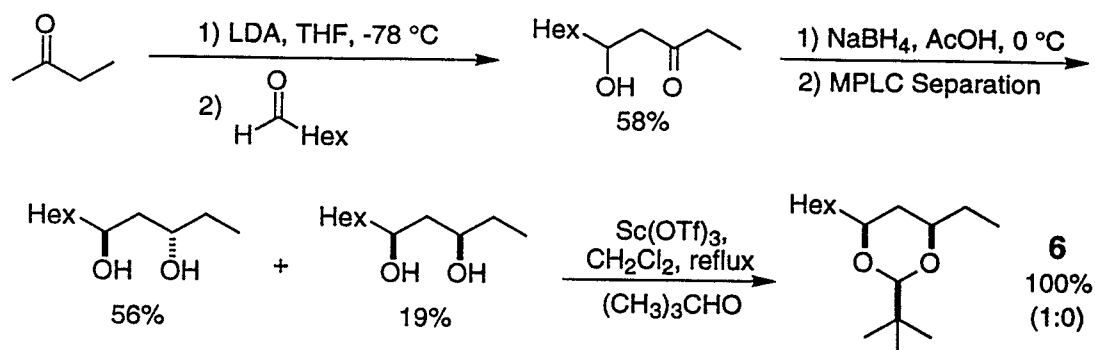**(2*R*\*,4*R*\*,6*S*\*)-2-*t*-Butyl-4-ethyl-6-hexyl-1,3-dioxane (6).**

A 10 mL round-bottomed flask was charged with 0.10 g (0.531 mmol) **6**, 6 mL CH<sub>2</sub>Cl<sub>2</sub>, and 9 mg (0.019 mmol) Sc(OTf)<sub>3</sub>. The mixture was refluxed through a Soxhlett extractor containing 4Å MS for 4 hr, and then washed with water, dried over MgSO<sub>4</sub>, and concentrated. The residual oil was purified by flash chromatography (SiO<sub>2</sub>, 20% CH<sub>2</sub>Cl<sub>2</sub>/hexanes) to give 0.141 g (100%) of a clear oil as a single diastereomer: *R*<sub>f</sub> 0.49 (30% CH<sub>2</sub>Cl<sub>2</sub>/hexanes); FT-IR (neat) 2956, 2931, 2858, 1483, 1463, 1379, 1363, 1217, 1121, 1089, 1055, 1005 cm<sup>-1</sup>; <sup>1</sup>H NMR (500 MHz, CDCl<sub>3</sub>) δ 4.05 (s, 1 H), 3.47 (m, 1 H), 3.39 (m, 1 H), 1.53 (m, 2 H), 1.41 (m, 4 H), 1.28 (m, 8 H), 0.93 (t, *J* = 7.6 Hz, 3 H), 0.90 (s, 9 H), 0.89 (t, *J* = 7.2 Hz, 3 H); <sup>13</sup>C NMR (125 MHz, CDCl<sub>3</sub>, DEPT) *C* 34.9; CH 106.7, 77.4, 76.1; CH<sub>2</sub> 36.9, 36.0, 31.9, 29.3, 29.0, 25.1, 22.6; CH<sub>3</sub> 24.8 (3), 14.1, 9.5; HRMS (CI/isobutane) calcd for [C<sub>16</sub>H<sub>32</sub>O<sub>2</sub>+H]<sup>+</sup> 257.2480, found 257.2471. Anal. calcd. for C<sub>16</sub>H<sub>32</sub>O<sub>2</sub>: C, 74.94; H, 12.58. Found: C, 75.33; H, 12.70.



# GC Trace of Crude Product of the Reaction of Et<sub>2</sub>Zn with 2 (Equation 1)

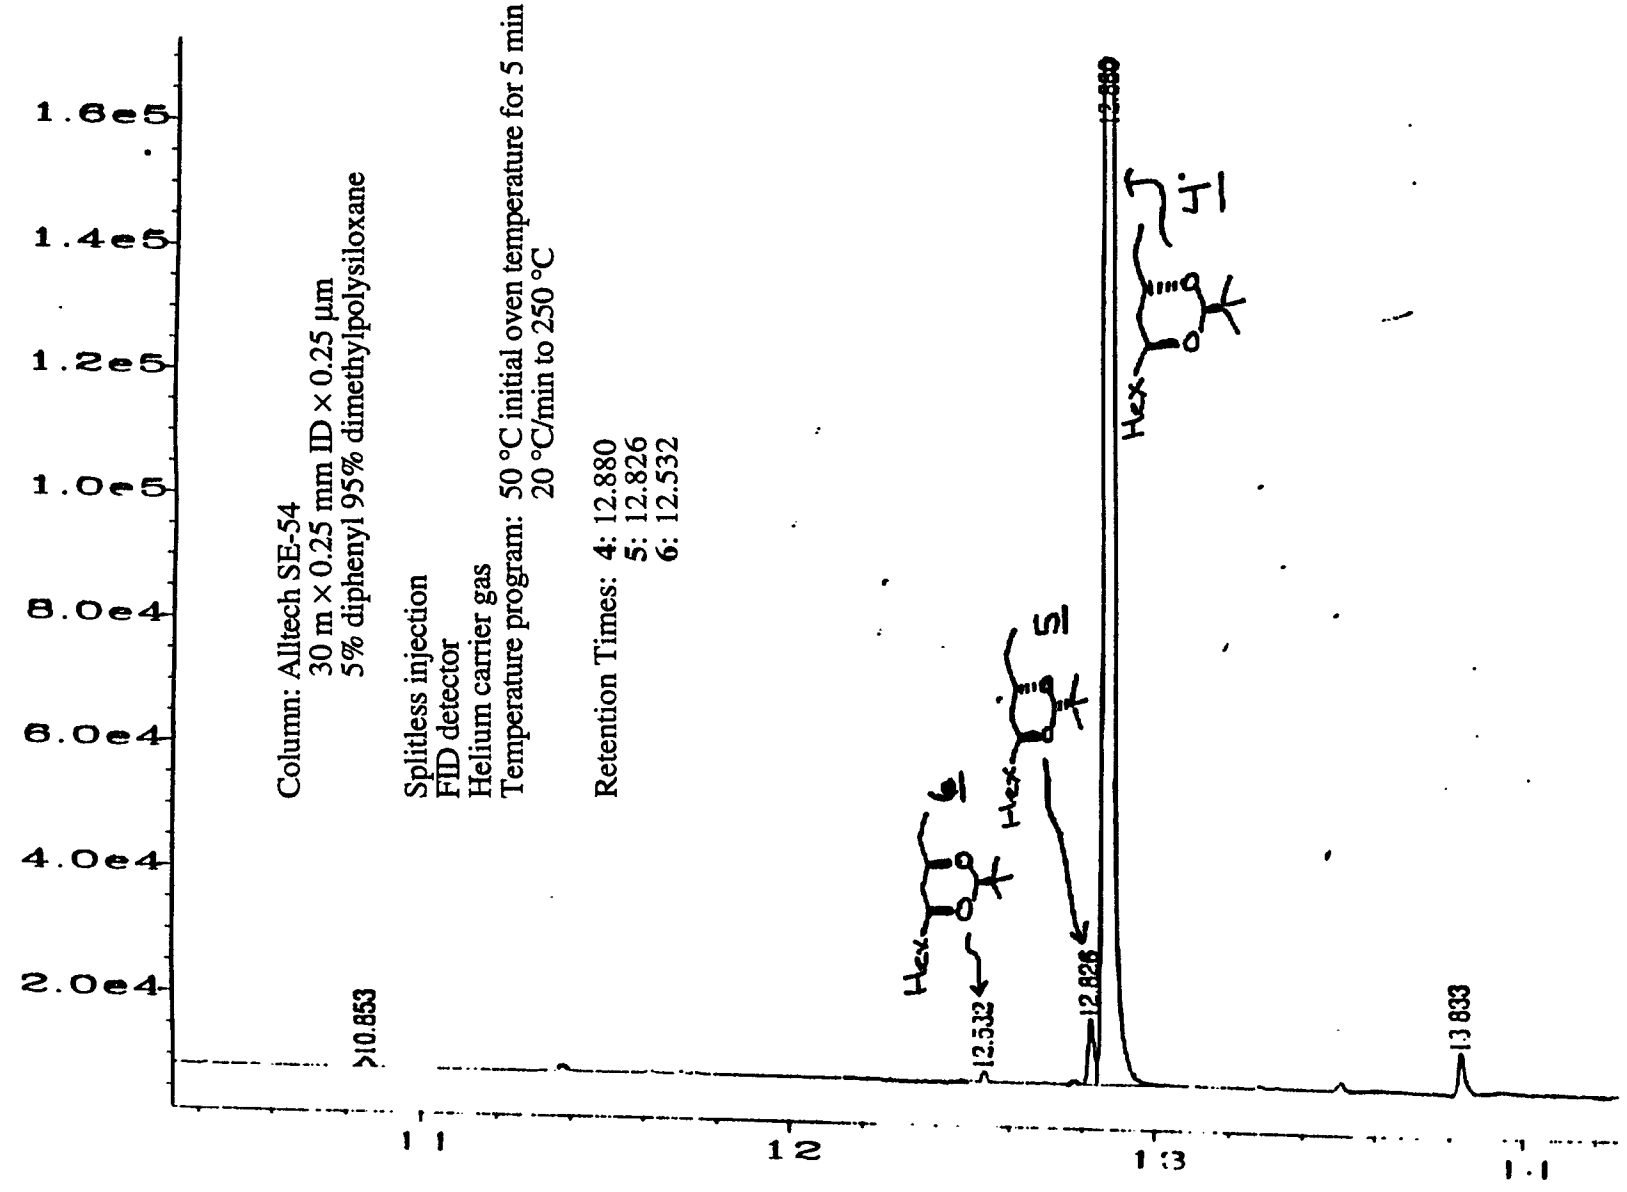

bic.1 Omega-500 Sat Mar 15 19:36:12 1997

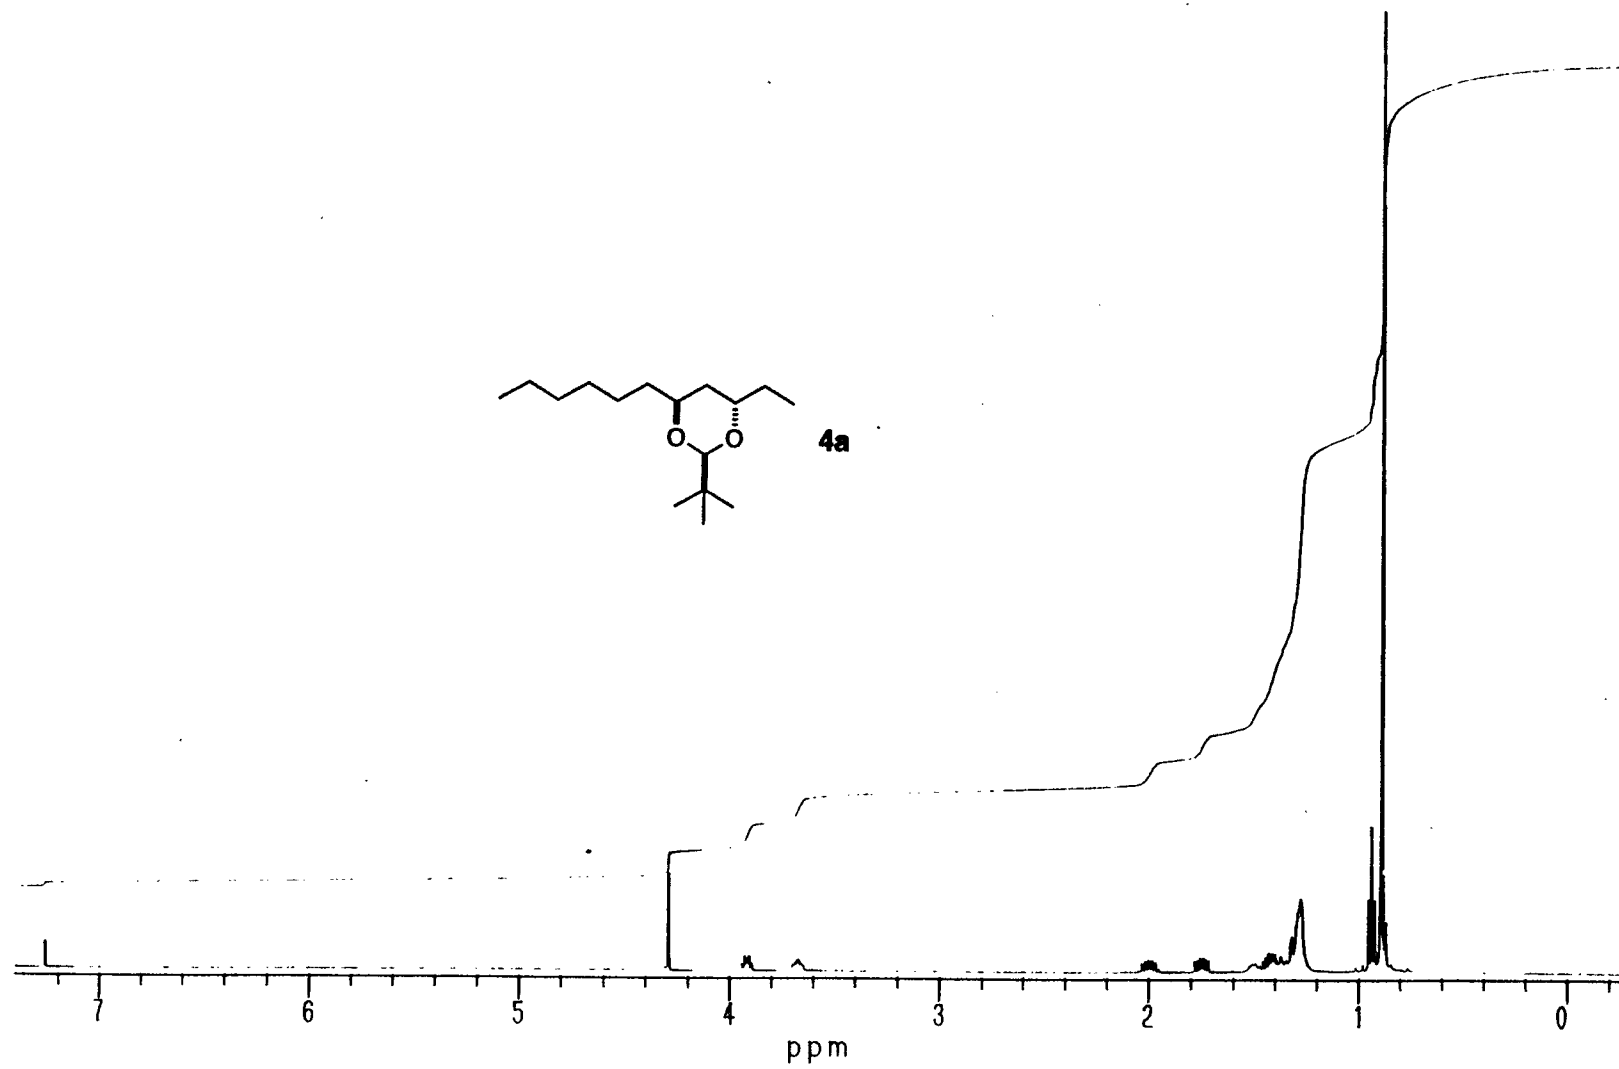

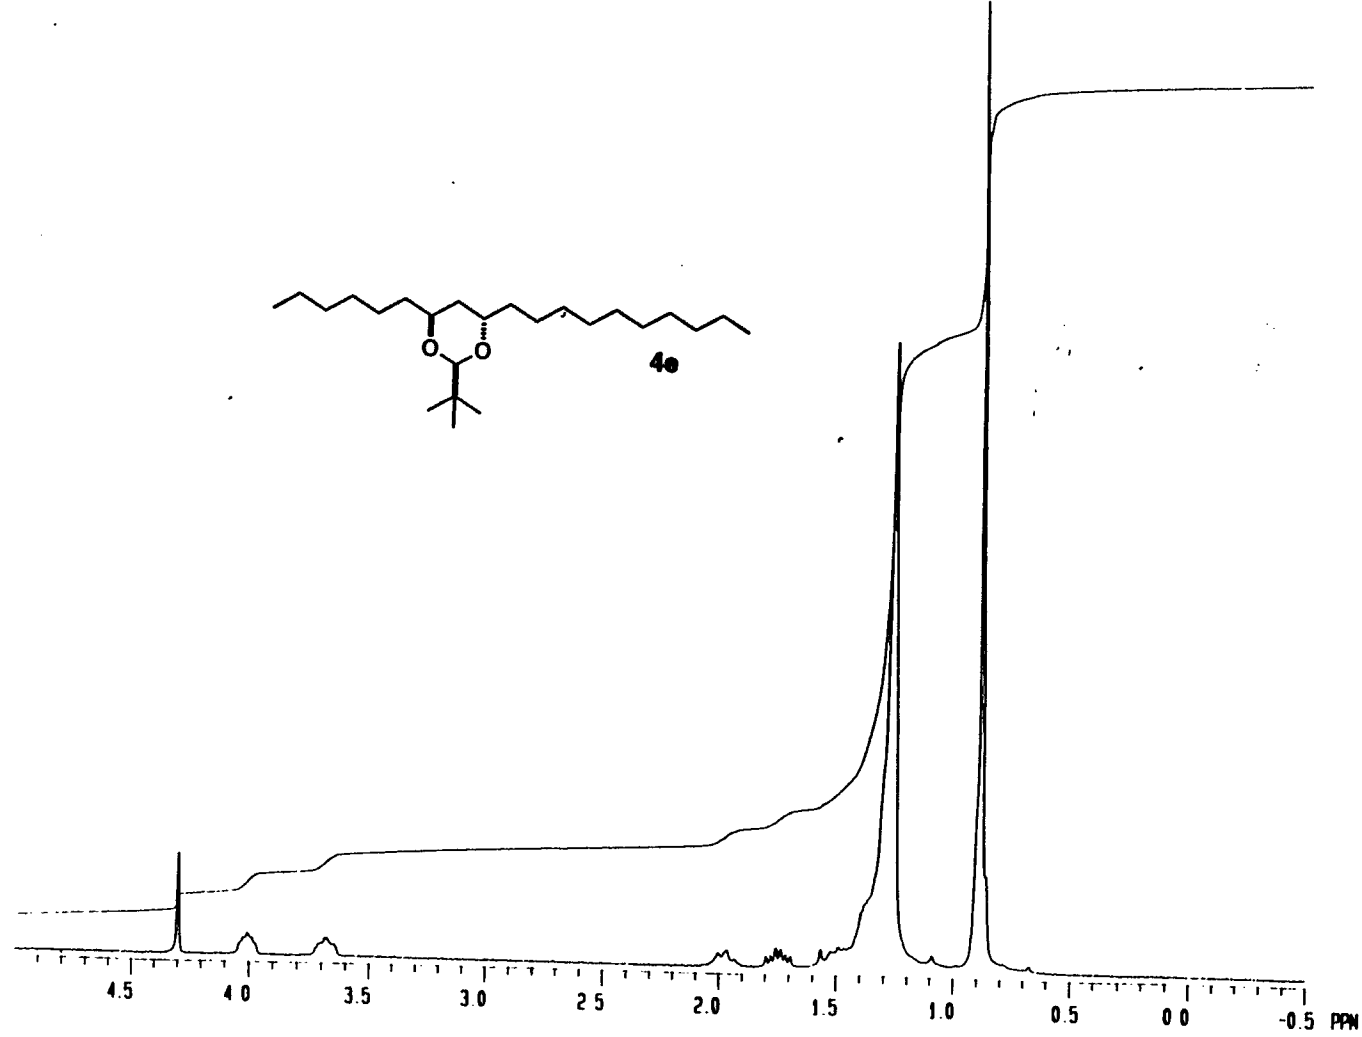

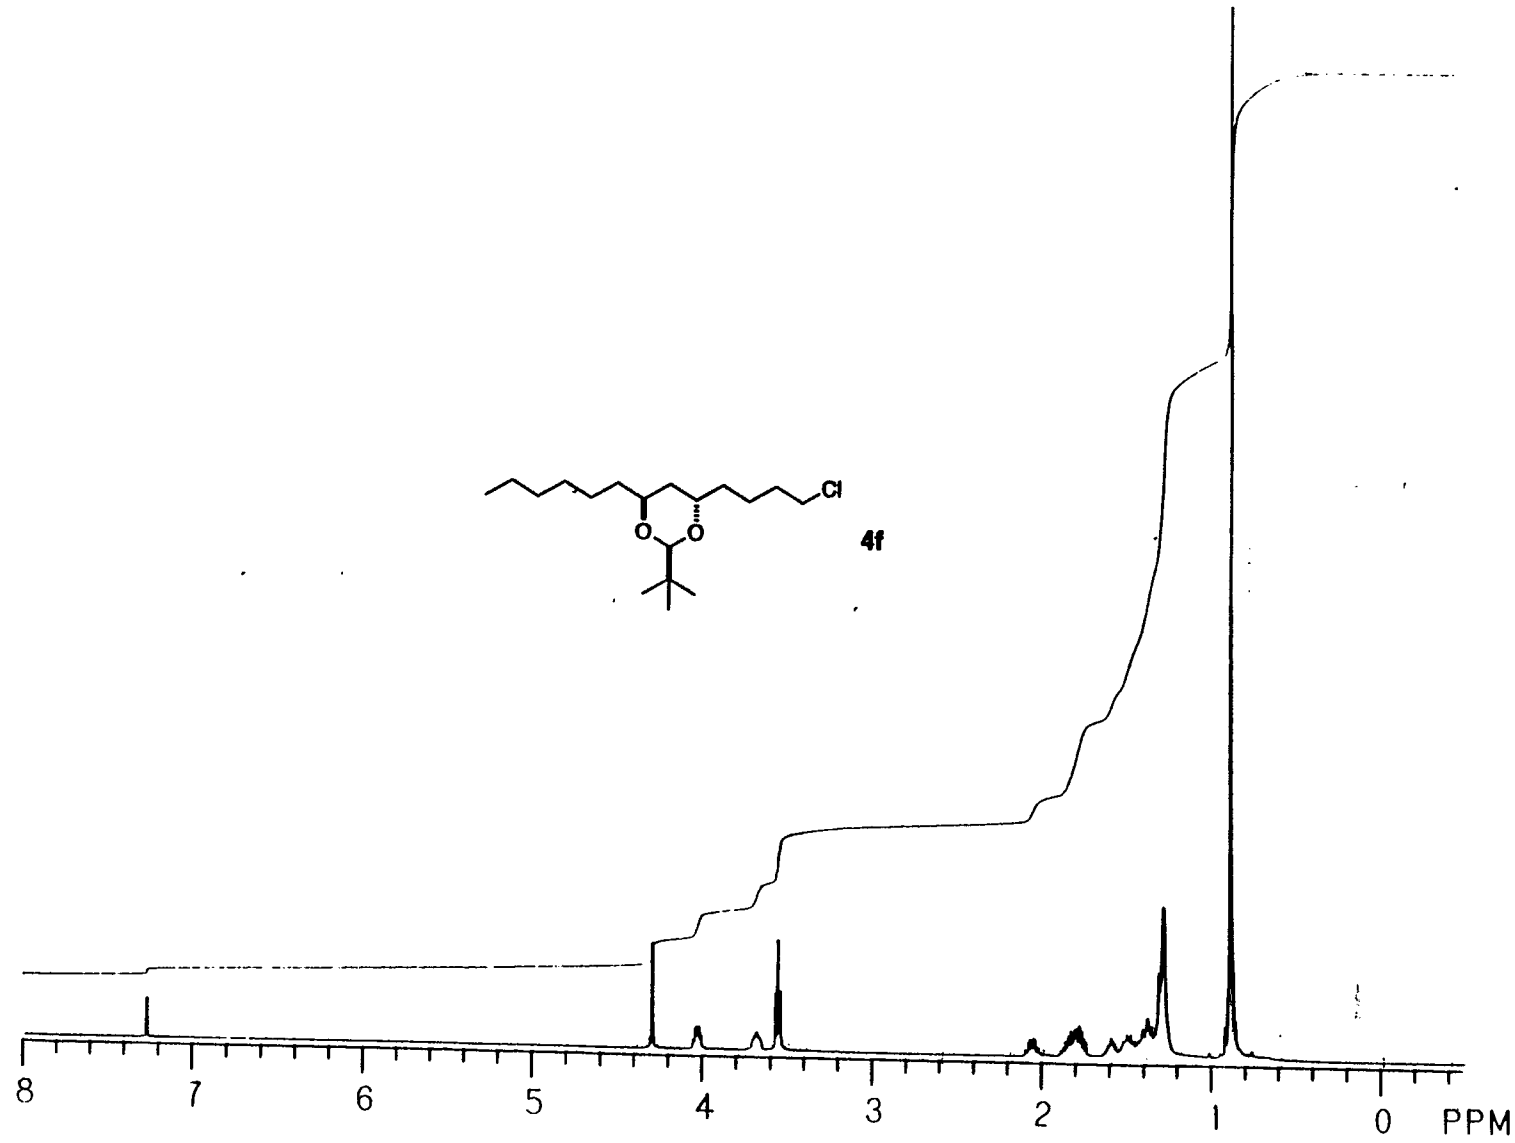

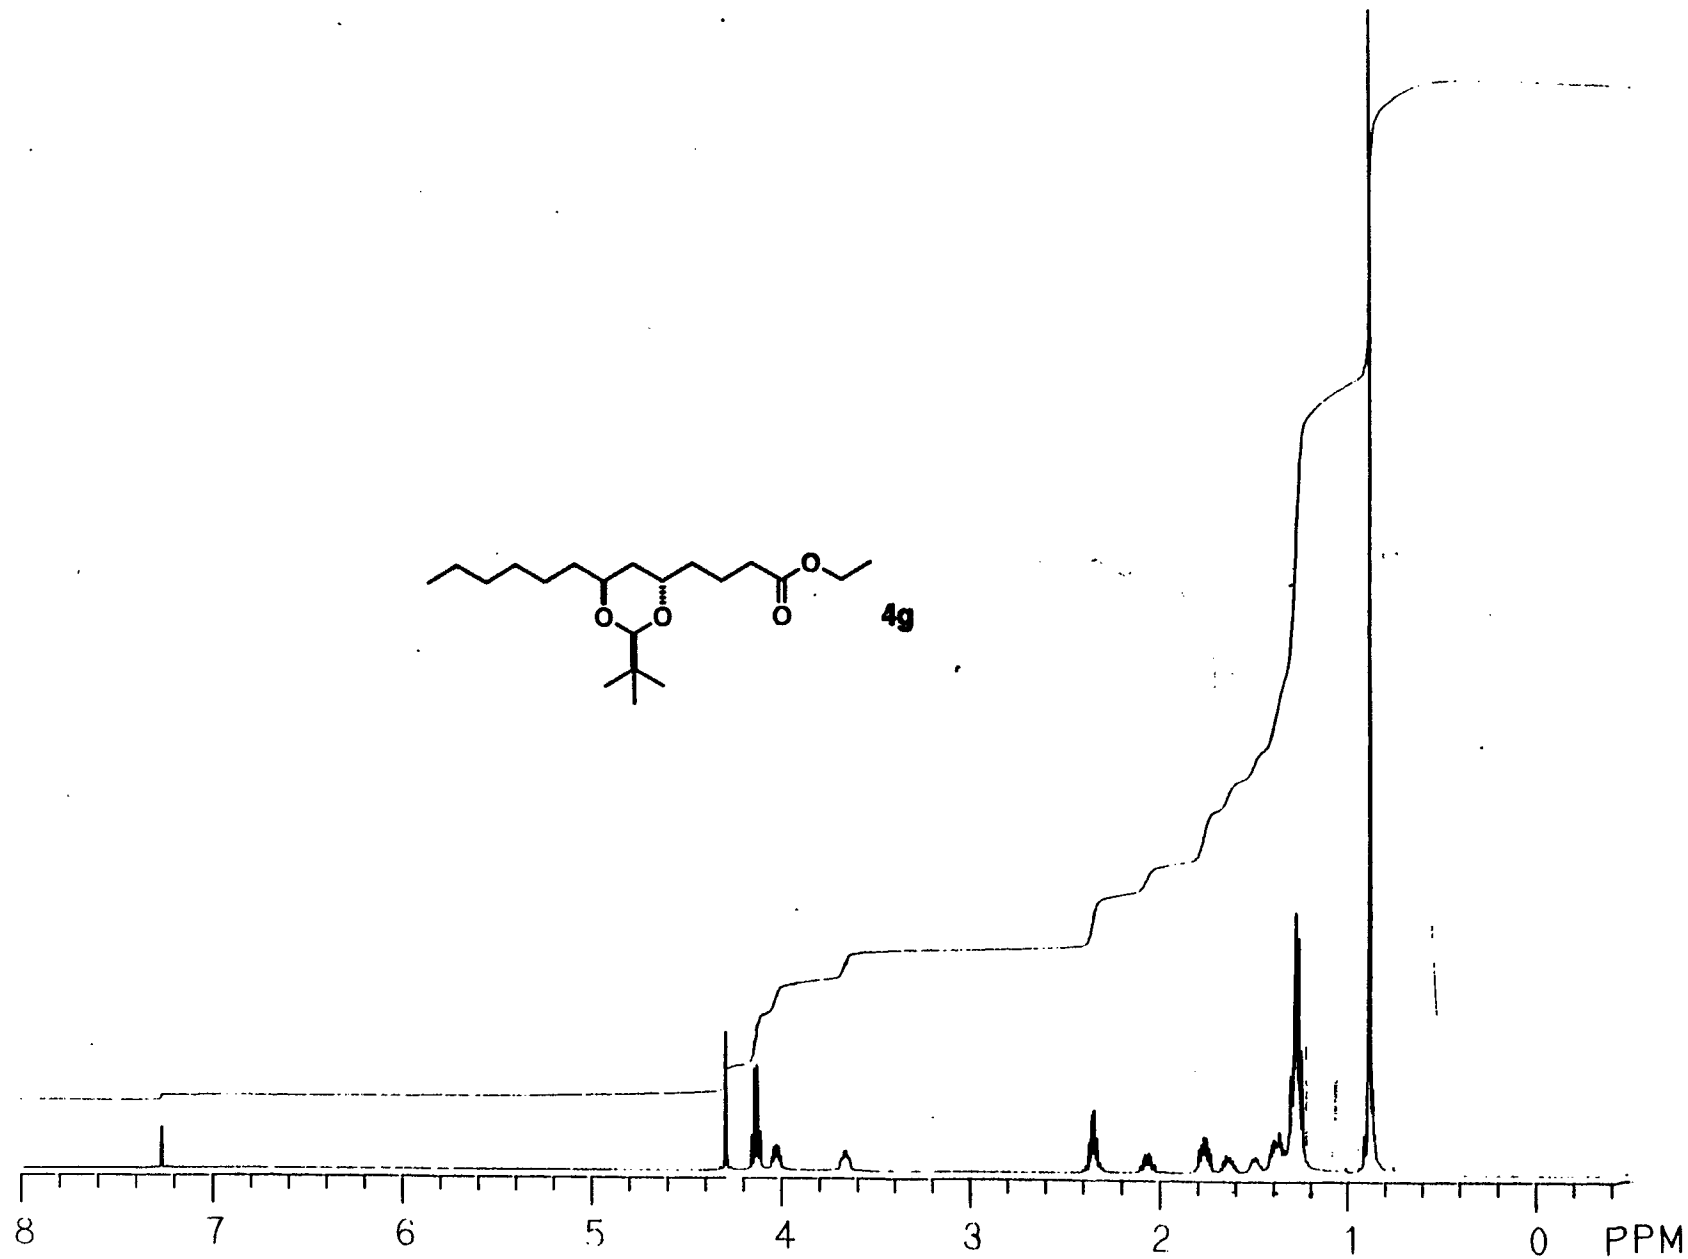

Supplement: Supplementary file 1 [file 5798082]
